# Supplementary material
Source: MDPI journal article supplement (https://www.mdpi.com/2225-1154/10/2/27)
Supplement: s1 [file s1]

Table S1. Annual average range of temperature (°C) and precipitation (%) values for two time periods for the three ESM selected for study, calculated based on the difference from the historical period (1970-1999).

| ESM              | Variable          | GFDL-ESM2G      | MIROC-ESM      | IPSL-CM5A-LR   |
|------------------|-------------------|-----------------|----------------|----------------|
|                  |                   | <i>Warm/Wet</i> | <i>Hot/Wet</i> | <i>Hot/Dry</i> |
| <b>2040-2069</b> | Temperature (°C)  | 2.7             | 4.3            | 3.6            |
|                  | Precipitation (%) | 4.2             | 6.2            | -5.7           |
| <b>2070-2099</b> | Temperature (°C)  | 4.6             | 7.0            | 6.3            |
|                  | Precipitation (%) | 8.5             | 7.8            | -15.6          |

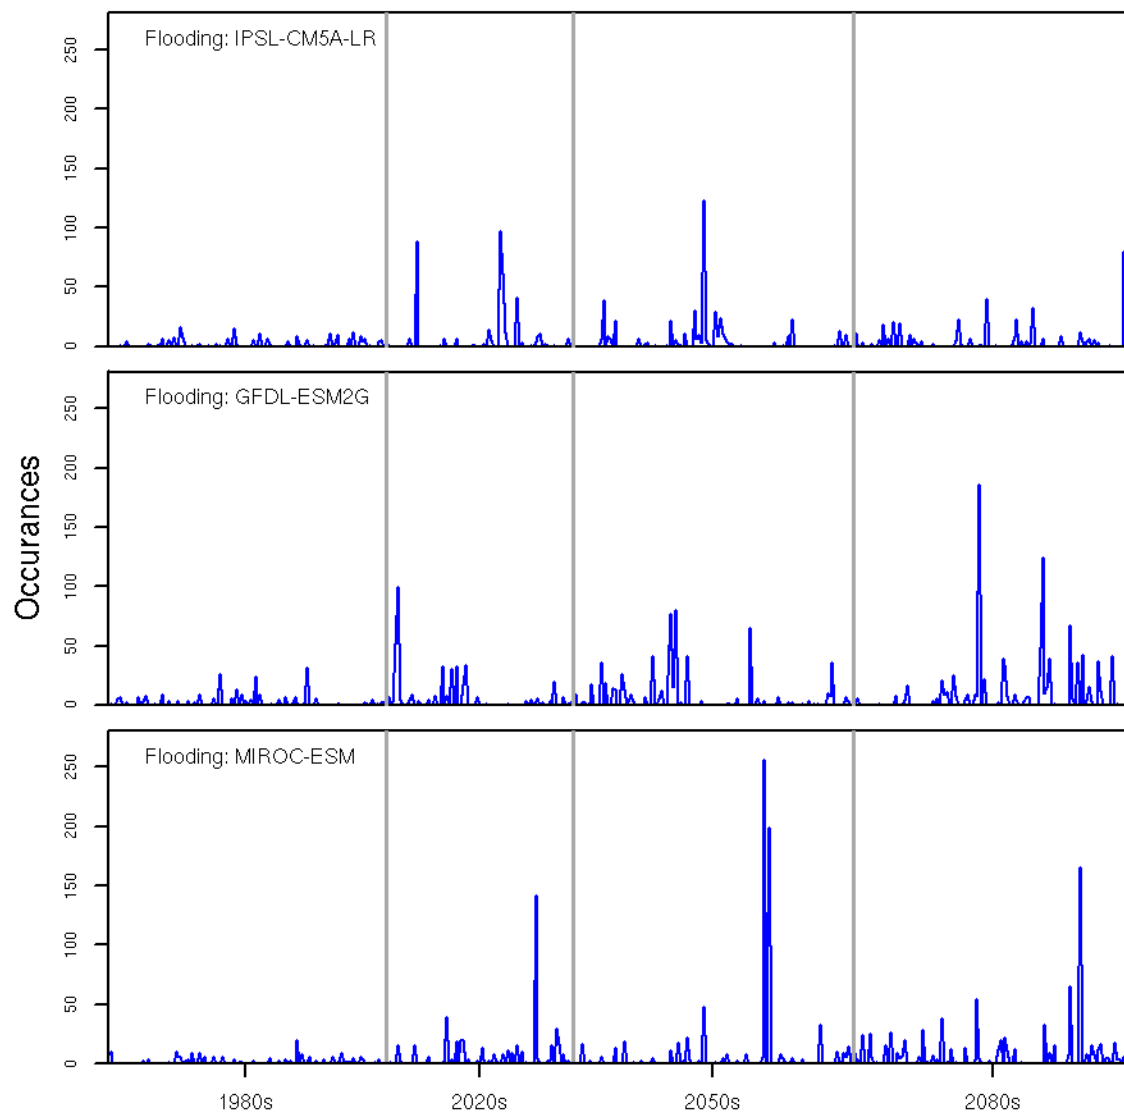

Figure S1. Flooding occurrences as counts of flooding events for all grid cells across the CRB. Each of three ESMs are shown, the driest ESM (IPSL-CM5A-LR) that is the focus of the main body of the work, the warm/wet ESM (GFDL-ESM2G), and the hot/wet ESM (MIROC-ESM). Grey lines show the 2000, 2030, and 2070 to align with periods of time presented in the paper.
